# Supplementary material for: Low-Carbohydrate and Low-Fat Diet with Metabolic-Dysfunction-Associated Fatty Liver Disease
Source: MDPI journal article supplement (doi:10.3390/nu15224763), 2023-11-13
Supplement: s1 [file s1]

## **Supplementary Online Content**

### **Low-carbohydrate and Low-fat Diet with metabolic-dysfunction-associated fatty liver disease**

**Chengxiang Hu, Rong Huang**

#### **Supplemental Methods**

**Supplementary Figure S1.** Flowchart of selecting participants in the analysis.

**Supplementary Table S1.** Criteria for Determining the Low-Carbohydrate-Diet Scores

**Supplementary Table S2.** Criteria for Determining the Low-Fat-Diet Scores

**Supplementary Table S3.** Correlation matrix between diet scores

**Supplementary Figure S2.** Odds ratio (ORs) of MAFLD per 5 points increases in healthy LCD score and healthy LFD score by Subgroups in NHANES (2017-2018).

**Supplementary Figure S3.** Odds ratio (ORs) of MAFLD per 5-points increase in unhealthy LCD score and unhealthy LFD score by Subgroups in NHANES (2017-2018). LCD, low-carbohydrate diet; LFD, low-fat diet; MAFLD, metabolic dysfunction associated fatty liver disease.

**Supplementary Table S4.** Association between LCD scores, LFD scores and MAFLD without hepatitis B or C virus.

**Supplementary Table S5.** Association between LCD scores, LFD scores and MAFLD without history of heart disease.

**Supplementary Table S6.** Association between specific macronutrients and MAFLD.

## **Reference**

## **Supplemental Methods**

### **Assessment of Dietary Intake**

NHANES has been implemented since 1999 using a complex, stratified, clustered multistage probability sampling design, which dietary data was evaluated applying 24-h recall, and twice collections would be carried out about 3-10 days. First 24-h recall was conducted in the Mobile Examination Center and the second by a telephone interview, even the new 5-step Automated Multiple-Pass Method was introduced to enhance the accuracy of dietary recall. In this study, we harmonized the US Department of Agriculture (USDA) Food Patterns Equivalents Database and the USDA Food and Nutrition Database for Dietary Studies (FNDDS) to assess macronutrient in detail.(1) Briefly, the major food groups offering high-quality carbohydrate were whole grains, whole fruit, legumes, and non-starchy vegetables, and offering low-quality carbohydrate were refined grains, added sugar, fruit juice, potato, other starchy vegetables and residual carbohydrates.(2) We defined animal protein as protein from fish/seafood, meat, cured meat, organ, poultry, egg, dairy products, and other animal sources and plant protein as protein from whole grains, refined grains, nuts, legumes, soy, and other plant sources. (3) To measure diet exposure perfectly, average consumption was utilized for assessing dietary intake.

### **Assessment of MAFLD**

MAFLD is a multisystem disease. Besides hepatic steatosis, individuals with MAFLD should suffer from at least one of the following three conditions: i) overweight or obesity(Body Mass Index (BMI)  $\geq 25$  kg/m<sup>2</sup>); ii) presence of diabetes mellitus (fasting glucose  $\geq 7.0$  mmol/L or hemoglobin A1c  $\geq 6.5\%$  or antidiabetic medications; iii) at least 2 metabolic risk abnormalities, including (a) Waist circumference(WC)  $\geq 102$  in men and 88 cm in women;(b) blood pressure  $\geq 130/85$  mmHg or specific drug treatment; (c) Plasma triglycerides  $\geq 150$  mg/dL ( $\geq 1.70$  mmol/L) or specific drug treatment; (d) Plasma HDL-cholesterol  $< 1.0$  mmol/L for male and  $< 1.3$ mmol/L for female or specific drug treatment; (e) prediabetes (fasting glucose 5.6-6.9 mmol/L or hemoglobin A1c 5.7%-6.4%; (f) homeostasis model assessment of insulin resistance score  $\geq 2.5$ ; (g) Plasma high-sensitivity C-reactive protein level  $> 2$  mg/L.

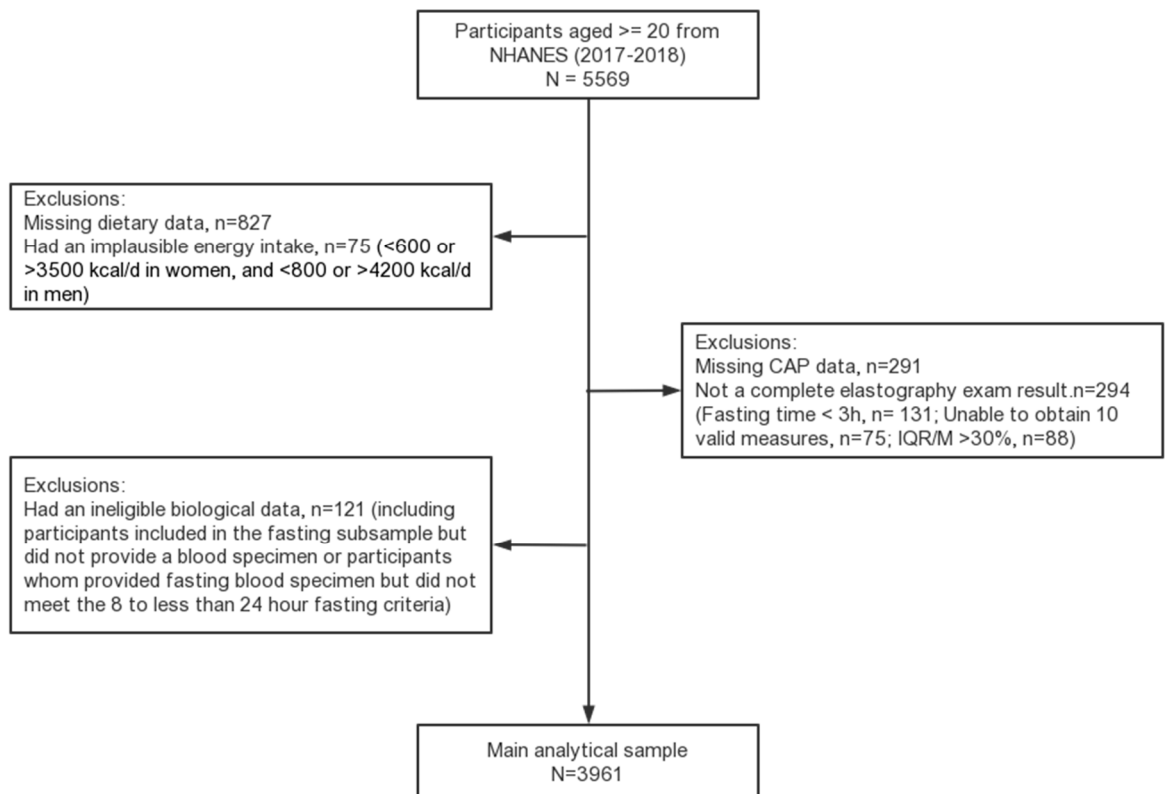

**Supplementary Figure S1.** Flowchart of selecting participants in the analysis. CAP, Controlled Attenuation Parameter; NHANES, National Health and Nutrition Examination Survey.

**Supplementary Table S1.** Criteria for Determining the Low-Carbohydrate-Diet Scores

| Points                                   | Overall LCD Score  |               |               | Unhealthy LCD Score       |               |                | Healthy LCD Scores       |                 |               |
|------------------------------------------|--------------------|---------------|---------------|---------------------------|---------------|----------------|--------------------------|-----------------|---------------|
|                                          | Total carbohydrate | Total fat     | Total protein | High quality carbohydrate | Saturated fat | Animal protein | Low quality carbohydrate | Unsaturated fat | Plant protein |
| Dietary intake, % of total energy intake |                    |               |               |                           |               |                |                          |                 |               |
| 0                                        | < 56.48            | < 28.19       | < 13.58       | > 16.82                   | < 9.34        | < 8.33         | > 48.56                  | < 18.09         | < 4.20        |
| 1                                        | 54.35 - 56.48      | 28.19 - 29.93 | 13.58 - 14.37 | 13.85 - 16.82             | 9.34 - 10.16  | 8.33 - 9.13    | 46.16 - 48.56            | 18.09 - 19.17   | 4.20 - 4.51   |
| 2                                        | 52.99 - 54.34      | 29.94 - 31.13 | 14.38 - 14.97 | 12.04 - 13.84             | 10.17 - 10.69 | 9.14 - 9.70    | 44.43 - 46.15            | 19.18 - 19.96   | 4.52 - 4.75   |
| 3                                        | 51.82 - 52.98      | 31.14 - 32.11 | 14.98 - 15.50 | 10.62 - 12.03             | 10.70 - 11.16 | 9.71 - 10.19   | 42.94 - 44.42            | 19.97 - 20.64   | 4.76 - 4.95   |
| 4                                        | 50.79 - 51.81      | 32.12 - 33.05 | 15.51 - 16.01 | 9.20 - 10.61              | 11.17 - 11.60 | 10.20 - 10.67  | 41.50 - 42.93            | 20.65 - 21.25   | 4.96 - 5.14   |
| 5                                        | 49.62 - 50.78      | 33.06 - 33.99 | 16.02 - 16.47 | 8.03 - 9.19               | 11.61 - 12.02 | 10.68 - 11.13  | 40.29 - 41.49            | 21.26 - 21.86   | 5.15 - 5.34   |
| 6                                        | 48.49 - 49.61      | 34.00 - 34.92 | 16.48 - 17.03 | 6.99 - 8.02               | 12.03 - 12.45 | 11.14 - 11.63  | 38.64 - 40.28            | 21.87 - 22.52   | 5.35 - 5.56   |
| 7                                        | 47.28 - 48.48      | 34.93 - 36.00 | 17.04 - 17.58 | 5.78 - 6.98               | 12.46 - 12.93 | 11.64 - 12.22  | 36.97 - 38.63            | 22.53 - 23.23   | 5.57 - 5.81   |
| 8                                        | 45.73 - 47.27      | 36.01 - 37.14 | 17.59 - 18.33 | 4.42 - 5.77               | 12.94 - 13.51 | 12.23 - 12.92  | 35.15 - 36.96            | 23.24 - 24.25   | 5.82 - 6.12   |
| 9                                        | 43.36 - 45.72      | 37.15 - 38.90 | 18.34 - 19.42 | 3.08 - 4.41               | 13.52 - 14.35 | 12.93 - 14.08  | 32.33 - 35.14            | 24.26 - 25.58   | 6.13 - 6.64   |
| 10                                       | < 43.36            | > 38.90       | > 19.42       | < 3.08                    | > 14.35       | > 14.08        | < 32.33                  | > 25.58         | > 6.64        |

Abbreviations: LCD, Low-carbohydrate diet.

High-quality carbohydrate was defined as carbohydrate from whole grains, whole fruit, legumes, and non-starchy vegetables. Low-quality carbohydrate was defined as carbohydrate from refined grains, added sugar, fruit juice, potato, other starchy vegetables, and other sources.

**Supplementary Table S2. Criteria for Determining the Low-Fat-Diet Scores**

| Points                                   | Overall LFD Score |                    |               | Unhealthy LFD Score |                          |                | Healthy LFD Scores |                           |               |
|------------------------------------------|-------------------|--------------------|---------------|---------------------|--------------------------|----------------|--------------------|---------------------------|---------------|
|                                          | Total fat         | Total carbohydrate | Total protein | Unsaturated fat     | Low quality carbohydrate | Animal protein | Saturated fat      | High quality carbohydrate | Plant protein |
| Dietary intake, % of total energy intake |                   |                    |               |                     |                          |                |                    |                           |               |
| 0                                        | > 38.90           | < 43.36            | < 13.58       | > 25.58             | < 32.33                  | < 8.33         | > 14.35            | < 3.08                    | < 4.20        |
| 1                                        | 37.15 - 38.90     | 43.36 - 45.72      | 13.58 - 14.37 | 24.26 - 25.58       | 32.33 - 35.14            | 8.33 - 9.13    | 13.52 - 14.35      | 3.08 - 4.41               | 4.20 - 4.51   |
| 2                                        | 36.01 - 37.14     | 45.73 - 47.27      | 14.38 - 14.97 | 23.24 - 24.25       | 35.15 - 36.96            | 9.14 - 9.70    | 12.94 - 13.51      | 4.42 - 5.77               | 4.52 - 4.75   |
| 3                                        | 34.93 - 36.00     | 47.28 - 48.48      | 14.98 - 15.50 | 22.53 - 23.23       | 36.97 - 38.63            | 9.71 - 10.19   | 12.46 - 12.93      | 5.78 - 6.98               | 4.76 - 4.95   |
| 4                                        | 34.00 - 34.92     | 48.49 - 49.61      | 15.51 - 16.01 | 21.87 - 22.52       | 38.64 - 40.28            | 10.20 - 10.67  | 12.03 - 12.45      | 6.99 - 8.02               | 4.96 - 5.14   |
| 5                                        | 33.06 - 33.99     | 49.62 - 50.78      | 16.02 - 16.47 | 21.26 - 21.86       | 40.29 - 41.49            | 10.68 - 11.13  | 11.61 - 12.02      | 8.03 - 9.19               | 5.15 - 5.34   |
| 6                                        | 32.12 - 33.05     | 50.79 - 51.81      | 16.48 - 17.03 | 20.65 - 21.25       | 41.50 - 42.93            | 11.14 - 11.63  | 11.17 - 11.60      | 9.20 - 10.61              | 5.35 - 5.56   |
| 7                                        | 31.14 - 32.11     | 51.82 - 52.98      | 17.04 - 17.58 | 19.97 - 20.64       | 42.94 - 44.42            | 11.64 - 12.22  | 10.70 - 11.16      | 10.62 - 12.03             | 5.57 - 5.81   |
| 8                                        | 29.94 - 31.13     | 52.99 - 54.34      | 17.59 - 18.33 | 19.18 - 19.96       | 44.43 - 46.15            | 12.23 - 12.92  | 10.17 - 10.69      | 12.04 - 13.84             | 5.82 - 6.12   |
| 9                                        | 28.19 - 29.93     | 54.35 - 56.48      | 18.34 - 19.42 | 18.09 - 19.17       | 46.16 - 48.56            | 12.93 - 14.08  | 9.34 - 10.16       | 13.85 - 16.82             | 6.13 - 6.64   |
| 10                                       | < 28.19           | > 56.48            | > 19.42       | < 18.09             | > 48.56                  | > 14.08        | < 9.34             | > 16.82                   | > 6.64        |

Abbreviations: LFD, low-fat diet.

High-quality carbohydrate was defined as carbohydrate from whole grains, whole fruit, legumes, and non-starchy vegetables. Low-quality carbohydrate was defined as carbohydrate from refined grains, added sugar, fruit juice, potato, other starchy vegetables, and other sources.

**Supplementary Table S3. Correlation matrix between diet scores.**

|                        | Overall<br>LCD<br>Score | Healthy<br>LCD<br>Scores | Unhealthy<br>LCD Score | Overall<br>LFD<br>Score | Healthy<br>LFD<br>Scores | Unhealthy<br>LFD<br>Score |
|------------------------|-------------------------|--------------------------|------------------------|-------------------------|--------------------------|---------------------------|
| Overall LCD<br>Score   | 1                       | -                        | -                      | -                       | -                        | -                         |
| Healthy<br>LCD Scores  | 0.646                   | 1                        | -                      | -                       | -                        | -                         |
| Unhealthy<br>LCD Score | 0.724                   | 0.014                    | 1                      | -                       | -                        | -                         |
| Overall LFD<br>Score   | -0.609                  | -0.397                   | -0.508                 | 1                       | -                        | -                         |
| Healthy LFD<br>Scores  | -0.356                  | 0.348                    | -0.823                 | 0.594                   | 1                        | -                         |
| Unhealthy<br>LFD Score | -0.388                  | -0.777                   | 0.127                  | 0.678                   | -0.113                   | 1                         |

Abbreviations: LCD, low-carbohydrate diet; LFD, low-fat diet.

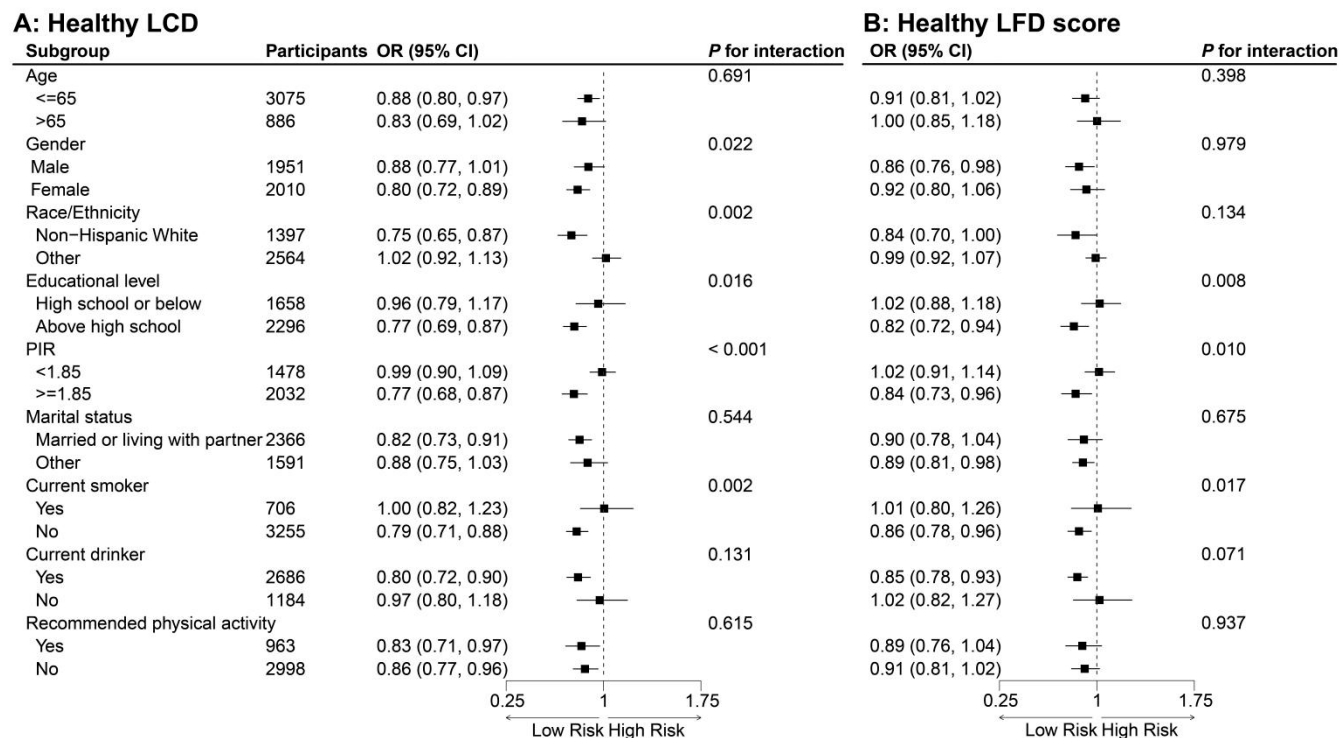

**Supplementary Figure S2.** Odds ratio (ORs) of MAFLD per 5 points increases in healthy LCD score and healthy LFD score by Subgroups in NHANES (2017-2018).

LCD, low-carbohydrate diet; LFD, low-fat diet; MAFLD, metabolic dysfunction associated fatty liver disease.

Adjusted for age (continuous), gender (male/female), race/ethnicity (non-Hispanic White/other), educational level (High school or below/College or above), marital status (Married or living with partner/other), PIR (<1.85/>=1.85), current smoker (yes/no), current drinker (yes/no), Recommended physical activity (yes/no), total energy intake (continuous).

Missing data in subgroup: educational level (n=7); marital status (n=4); PIR (n=451); current drinker (n=91).



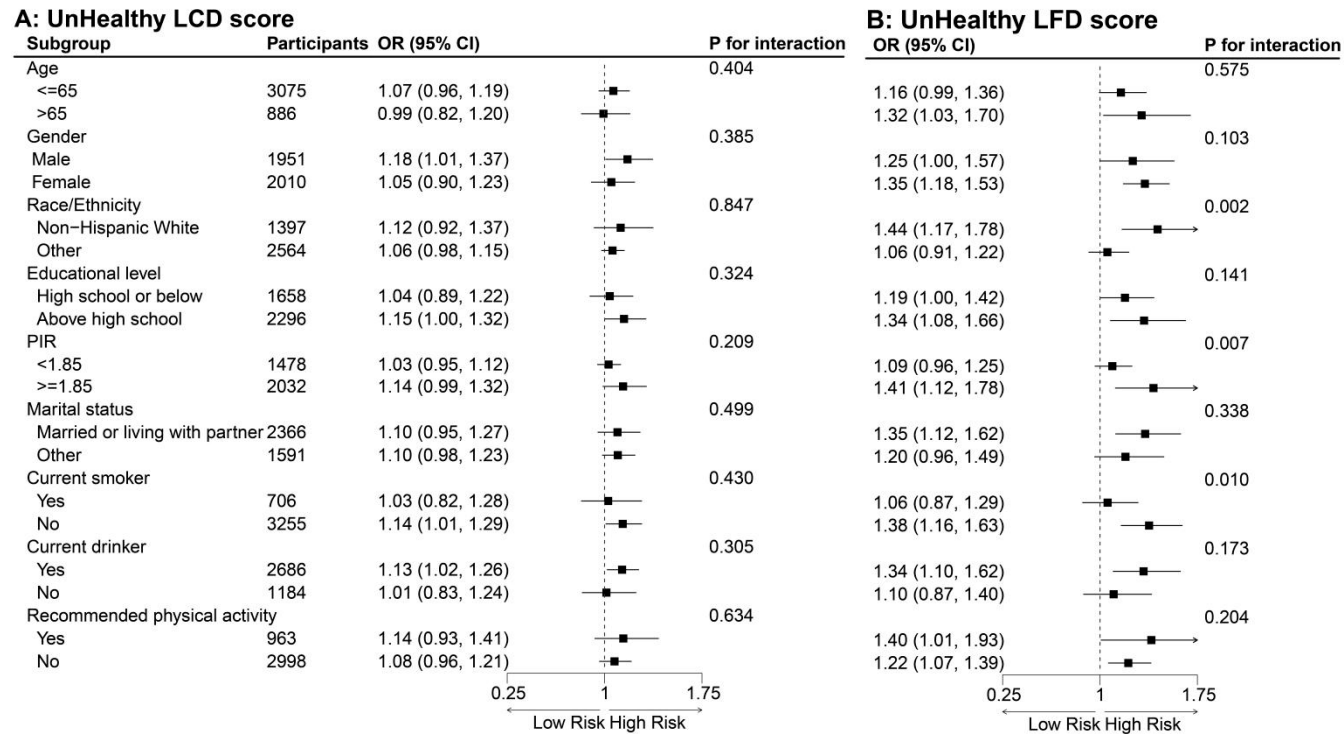

**Supplementary Figure S3.** Odds ratio (ORs) of MAFLD per 5-points increase in unhealthy LCD score and unhealthy LFD score by Subgroups in NHANES (2017-2018). LCD, low-carbohydrate diet; LFD, low-fat diet; MAFLD, metabolic dysfunction associated fatty liver disease.

Adjusted for age (continuous), gender (male/female), race/ethnicity (non-Hispanic White/other), educational level (High school or below/College or above), marital status (Married or living with partner/other), PIR (<1.85/≥1.85), current smoker (yes/no), current drinker (yes/no), Recommended physical activity (yes/no), total energy intake (continuous).

Missing data in subgroup: educational level (n=7); marital status (n=4); PIR (n=451); current drinker (n=91).

**Supplementary Table S4.** Association between LCD scores, LFD scores and MAFLD without hepatitis B or C virus.

| Association between LCD scores, LFD scores and MAFLD |                         |                          |                          |              |                          |
|------------------------------------------------------|-------------------------|--------------------------|--------------------------|--------------|--------------------------|
|                                                      | Tertiles of diet scores |                          |                          | P for trend  | Per 5-points increase    |
|                                                      | Tertile 1               | Tertile 2                | Tertile 3                |              |                          |
| Overall LCD score                                    |                         |                          |                          |              |                          |
| Median score (IQR)                                   | 7 (4-9)                 | 16 (13-17)               | 24 (22-27)               |              |                          |
| Cases/participants, n/n                              | 768/1396                | 712/1242                 | 709/1224                 |              |                          |
| Model 1                                              | Reference               | 0.96 (0.70, 1.31)        | 0.84(0.63, 1.31)         | 0.237        | 0.94 (0.87, 1.01)        |
| Model 2                                              | Reference               | 0.95 (0.70, 1.29)        | 0.88 (0.65, 1.22)        | 0.439        | 0.95 (0.87, 1.04)        |
| Unhealthy LCD score                                  |                         |                          |                          |              |                          |
| Median score (IQR)                                   | 8 (5-11)                | 16 (14-17)               | 22 (20-24)               |              |                          |
| Cases/participants, n/n                              | 766/1388                | 702/1230                 | 721/1244                 |              |                          |
| Model 1                                              | Reference               | <b>1.37 (1.12, 1.66)</b> | <b>1.39(1.05, 1.83)</b>  | <b>0.020</b> | <b>1.11 (1.01, 1.20)</b> |
| Model 2                                              | Reference               | 1.32 (1.00, 1.73)        | <b>1.43 (1.01, 2.02)</b> | <b>0.044</b> | <b>1.12 (1.00, 1.25)</b> |
| Healthy LCD score                                    |                         |                          |                          |              |                          |
| Median score (IQR)                                   | 9 (6-11)                | 16 (14-17)               | 22 (20-24)               |              |                          |
| Cases/participants, n/n                              | 799/1437                | 692/1177                 | 698/1248                 |              |                          |
| Model 1                                              | Reference               | <b>0.85 (0.68, 1.06)</b> | <b>0.59 (0.44, 0.80)</b> | <b>0.002</b> | <b>0.84 (0.78, 0.91)</b> |
| Model 2                                              | Reference               | 0.82 (0.63, 1.07)        | <b>0.60 (0.42, 0.87)</b> | <b>0.008</b> | <b>0.85 (0.77, 0.93)</b> |
| Overall LFD score                                    |                         |                          |                          |              |                          |
| Median score (IQR)                                   | 9 (7-11)                | 15 (14-17)               | 21 (20-23)               |              |                          |
| Cases/participants, n/n                              | 801/1414                | 710/1271                 | 678/1177                 |              |                          |
| Model 1                                              | Reference               | 1.16 (0.92, 1.47)        | <b>1.23 (0.92, 1.67)</b> | <b>0.131</b> | 1.07 (0.97, 1.19)        |
| Model 2                                              | Reference               | 1.21 (0.92, 1.58)        | 1.28 (0.86, 1.91)        | 0.179        | 1.10 (0.96, 1.26)        |
| Unhealthy LFD score                                  |                         |                          |                          |              |                          |
| Median score (IQR)                                   | 10 (8-12)               | 16 (15-17)               | 21 (20-23)               |              |                          |
| Cases/participants, n/n                              | 871/1533                | 729/1287                 | 589/1042                 |              |                          |
| Model 1                                              | Reference               | <b>1.53 (1.26, 1.86)</b> | <b>1.72 (1.26, 2.34)</b> | <b>0.001</b> | <b>1.26 (1.11, 1.44)</b> |
| Model 2                                              | Reference               | <b>1.59(1.23, 2.05)</b>  | <b>1.82 (1.21, 2.72)</b> | <b>0.004</b> | <b>1.29 (1.09, 1.52)</b> |
| Healthy LFD score                                    |                         |                          |                          |              |                          |
| Median score (IQR)                                   | 8 (5-10)                | 15 (13-17)               | 23 (21-26)               |              |                          |
| Cases/participants, n/n                              | 773/1349                | 715/1233                 | 701/1280                 |              |                          |
| Model 1                                              | Reference               | 0.87 (0.72, 1.06)        | <b>0.62 (0.49, 0.78)</b> | <b>0.001</b> | <b>0.87(0.81, 0.94)</b>  |
| Model 2                                              | Reference               | 0.90 (0.70, 1.15)        | <b>0.63 (0.47, 0.85)</b> | <b>0.006</b> | <b>0.88 (0.80, 0.98)</b> |

Abbreviations: LCD, low-carbohydrate diet; LFD, low-fat diet; MAFLD, metabolic dysfunction associated fatty liver disease.

Model 1: Adjusted for age (continuous), gender (male/female), race/ethnicity (non-Hispanic White/ other).

Model 2: Adjusted for age (continuous), gender (male/female), race/ethnicity (non-Hispanic White/other), educational level (High school or below/College or above), marital status (Married or living with partner/other), PIR (<1.85/≥1.85), current smoker (yes/no), current drinker (yes/no), Recommended physical activity (yes/no), total energy intake (continuous).

**Supplementary Table S5.** Association between LCD scores, LFD scores and MAFLD without history of heart disease.

|                         | Tertiles of diet scores |                          |                          | P for trend  | Per 5-points increase    |
|-------------------------|-------------------------|--------------------------|--------------------------|--------------|--------------------------|
|                         | Tertile 1               | Tertile 2                | Tertile 3                |              |                          |
| Overall LCD score       |                         |                          |                          |              |                          |
| Median score (IQR)      | 7 (4-9)                 | 16 (13-17)               | 24 (22-27)               |              |                          |
| Cases/participants, n/n | 677/1274                | 639/1152                 | 632/1115                 |              |                          |
| Model 1                 | Reference               | 0.98 (0.72, 1.34)        | 0.94 (0.71, 1.25)        | 0.661        | 0.96 (0.89, 1.04)        |
| Model 2                 | Reference               | 0.95 (0.70, 1.29)        | 0.97 (0.71, 1.33)        | 0.855        | 0.96 (0.88, 1.06)        |
| Unhealthy LCD score     |                         |                          |                          |              |                          |
| Median score (IQR)      | 9 (5-11)                | 16 (14-17)               | 22 (20-24)               |              |                          |
| Cases/participants, n/n | 685/1273                | 633/1135                 | 630/1133                 |              |                          |
| Model 1                 | Reference               | 1.30 (1.01, 1.67)        | <b>1.36 (1.01, 1.84)</b> | <b>0.050</b> | <b>1.11 (1.01, 1.22)</b> |
| Model 2                 | Reference               | 1.22 (0.88, 1.68)        | 1.37(0.94, 2.02)         | 0.101        | 1.12 (0.99, 1.27)        |
| Healthy LCD score       |                         |                          |                          |              |                          |
| Median score (IQR)      | 9 (6-11)                | 16 (14-17)               | 22 (20-24)               |              |                          |
| Cases/participants, n/n | 707/1316                | 623/1102                 | 618/1123                 |              |                          |
| Model 1                 | Reference               | 0.83 (0.60, 1.14)        | <b>0.67 (0.50, 0.89)</b> | <b>0.010</b> | <b>0.87 (0.80, 0.94)</b> |
| Model 2                 | Reference               | 0.74 (0.52, 1.04)        | <b>0.65 (0.45, 0.92)</b> | <b>0.014</b> | <b>0.85 (0.77, 0.94)</b> |
| Overall LFD score       |                         |                          |                          |              |                          |
| Median score (IQR)      | 9 (7-11)                | 15.5 (14-17)             | 21 (20-22)               |              |                          |
| Cases/participants, n/n | 709/1298                | 630/1172                 | 609/1071                 |              |                          |
| Model 1                 | Reference               | 1.10 (0.81, 1.52)        | 1.17 (0.89, 1.55)        | 0.267        | 1.05 (0.94, 1.18)        |
| Model 2                 | Reference               | 1.14(0.79, 1.63)         | 1.23 (0.84, 1.81)        | 0.282        | 1.07 (0.93, 1.24)        |
| Unhealthy LFD score     |                         |                          |                          |              |                          |
| Median score (IQR)      | 10 (8-12)               | 16 (15-17)               | 21 (20-23)               |              |                          |
| Cases/participants, n/n | 784/1411                | 642/1177                 | 522/953                  |              |                          |
| Model 1                 | Reference               | <b>1.43 (1.14, 1.81)</b> | <b>1.61 (1.16, 2.24)</b> | <b>0.004</b> | <b>1.22 (1.06, 1.40)</b> |
| Model 2                 | Reference               | <b>1.49 (1.12, 1.97)</b> | <b>1.76 (1.15, 2.72)</b> | <b>0.009</b> | <b>1.25 (1.05, 1.49)</b> |
| Healthy LFD score       |                         |                          |                          |              |                          |
| Median score (IQR)      | 8 (5-10)                | 15 (13-17)               | 23 (21-26)               |              |                          |
| Cases/participants, n/n | 675/1232                | 641/1142                 | 632/1167                 |              |                          |
| Model 1                 | Reference               | 0.87(0.70, 1.08)         | <b>0.64 (0.49, 0.84)</b> | <b>0.005</b> | <b>0.88 (0.81, 0.96)</b> |
| Model 2                 | Reference               | 0.87 (0.66, 1.14)        | <b>0.64 (0.44, 0.92)</b> | <b>0.023</b> | <b>0.88 (0.79, 0.99)</b> |

Abbreviations: LCD, low-carbohydrate diet; LFD, low-fat diet; MAFLD, metabolic dysfunction associated fatty liver disease.

Model 1: Adjusted for age (continuous), gender (male/female), race/ethnicity (non-Hispanic White/ other).

Model 2: Adjusted for age (continuous), gender (male/female), race/ethnicity (non-Hispanic White/other), educational level (High school or below/College or above), marital status (Married or living with partner/other), PIR (<1.85/≥1.85), current smoker (yes/no), current drinker (yes/no), Recommended physical activity (yes/no), total energy intake (continuous).

**Supplementary Table S6.** Association between specific macronutrients and MAFLD.

|                    | Tertiles of macronutrients consumption of total energy intake |                   |                          | Per 3% energy increment of total intake increase |
|--------------------|---------------------------------------------------------------|-------------------|--------------------------|--------------------------------------------------|
|                    | Tertile 1                                                     | Tertile 2         | Tertile 3                |                                                  |
| Total carbohydrate | Reference                                                     | 1.02 (0.75, 1.40) | 1.16 (0.84, 1.61)        | 1.04 (0.96, 1.12)                                |
| High carbohydrate  | Reference                                                     | 0.84 (0.62, 1.13) | <b>0.67 (0.48, 0.95)</b> | <b>0.90 (0.82, 0.98)</b>                         |
| Low carbohydrate   | Reference                                                     | 1.32 (0.91, 1.90) | <b>1.58 (1.20, 2.08)</b> | <b>1.10 (1.03, 1.17)</b>                         |
| Total fat          | Reference                                                     | 0.88 (0.69, 1.13) | 0.79 (0.58, 1.07)        | 0.96 (0.87, 1.06)                                |
| Unsaturated fat    | Reference                                                     | 0.82 (0.59, 1.14) | 0.75 (0.55, 1.03)        | 0.89 (0.78, 1.01)                                |
| Saturated fat      | Reference                                                     | 1.02 (0.84, 1.25) | 1.15 (0.9, 1.46)         | 1.08 (0.88, 1.33)                                |
| Total protein      | Reference                                                     | 0.81 (0.63, 1.06) | 0.96 (0.66, 1.4)         | 0.96 (0.77, 1.20)                                |
| Animal protein     | Reference                                                     | 0.97 (0.73, 1.29) | 1.11 (0.74, 1.67)        | 1.04 (0.84, 1.28)                                |
| Plant protein      | Reference                                                     | 1.16 (0.76, 1.76) | 0.85 (0.67, 1.08)        | <b>0.67 (0.47, 0.94)</b>                         |

Adjusted for age (continuous), gender (male/female), race/ethnicity (non-Hispanic White/other), educational level (High school or below/College or above), marital status (Married or living with partner/other), PIR (<1.85/≥1.85), current smoker (yes/no), current drinker (yes/no), Recommended physical activity (yes/no), total energy intake (continuous).

## References

1. Blanton CA, Moshfegh AJ, Baer DJ, Kretsch MJ. The USDA automated multiple-pass method accurately estimates group total energy and nutrient intake. *J Nutr* 2006;136:2594-2599.
2. Drewnowski A, Maillot M, Vieux F. Multiple metrics of carbohydrate quality place starchy vegetables alongside non-starchy vegetables, legumes, and whole fruit. *Front Nutr* 2022;9:867378.
3. Pasiakos SM, Agarwal S, Lieberman HR, Fulgoni VL, 3rd. Sources and amounts of animal, dairy, and plant protein intake of US adults in 2007-2010. *Nutrients* 2015;7:7058-7069.
